# Supplementary material for: Vapour generation at a UV/TiO2 photocatalysis reaction device for determination and speciation of mercury by AFS and HPLC-AFS
Source: Royal Society of Chemistry journal article supplement (doi:10.1039/b614555h), 2007-01-01
Supplement: b614555h.pdf [file b614555h.pdf]

## Electronic supplementary information

# Vapour Generation at an UV/TiO<sub>2</sub> Photocatalytical Reaction Device for Determination and Speciation of Mercury by AFS and HPLC-AFS

Yanmin Yin,<sup>a</sup> Jing Liang,<sup>a</sup> Limin Yang<sup>a</sup> and Qiuquan Wang<sup>\*a,b</sup>

<sup>a</sup> Department of Chemistry & the MOE Key Laboratory of Analytical Sciences, Xiamen University, Xiamen 361005, China. Fax: +86 592 2181796; Tel: +86 592 2181796; E-mail: qqwang@xmu.edu.cn

<sup>b</sup> State Key Laboratory of Marine Environmental Science, Xiamen University, Xiamen 361005, China. Fax: +86 592 2181796; Tel: +86 592 2181796; E-mail: qqwang@xmu.edu.cn

## Figures

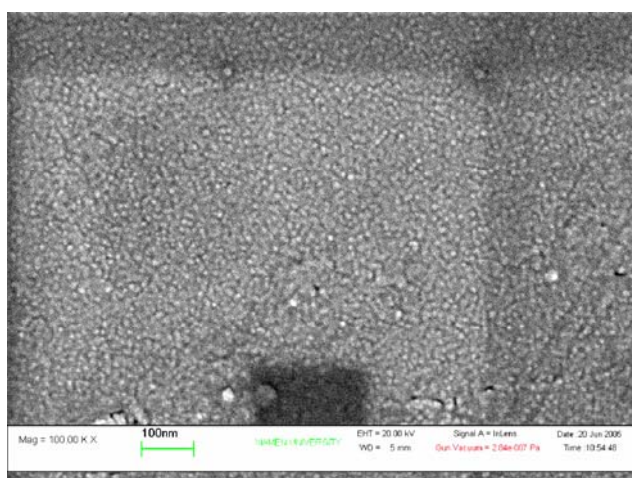

Fig. S1 SEM image of nano TiO<sub>2</sub> film coated on the glass fibre.

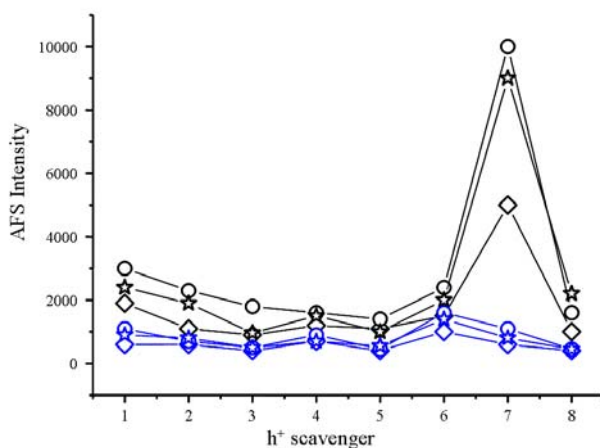

Fig. S2 Effect of h<sup>+</sup> scavenger on the vapor generation efficiency of Hg species of 5 ng each with UV/TiO<sub>2</sub> PCRD and without UV/TiO<sub>2</sub> PCRD but only UV irradiation. 1) potassium sodium tartrate; 2) tartaric acid; 3) oxalic acid; 4) glycerol; 5) β-cyclodextrin; 6) hydroquinone; 7) HCOOH/HCOONa buffer; 8) H<sub>2</sub>O. ◇ Hg<sup>2+</sup>; ○ MMC; ☆ EMC. The black line: with UV/TiO<sub>2</sub> PCRD; the blue line: without UV/TiO<sub>2</sub> PCRD but only UV irradiation. Each point in the figure represented the average value of AFS intensity of 5 replicate runs, and the RSD was less than 3% in all the cases.
